# Supplementary material for: Neurobiological Signatures of Auditory False Perception and Phantom Perception as a Consequence of Sensory Prediction Errors
Source: MDPI journal article supplement (doi:10.3390/biology11101501), 2022-10-13

**Supplementary Figure S1. Functional connectivity in healthy subjects during an auditory prestimulus time window (-300 ms to 0 ms) in the Talk and Listen paradigms**

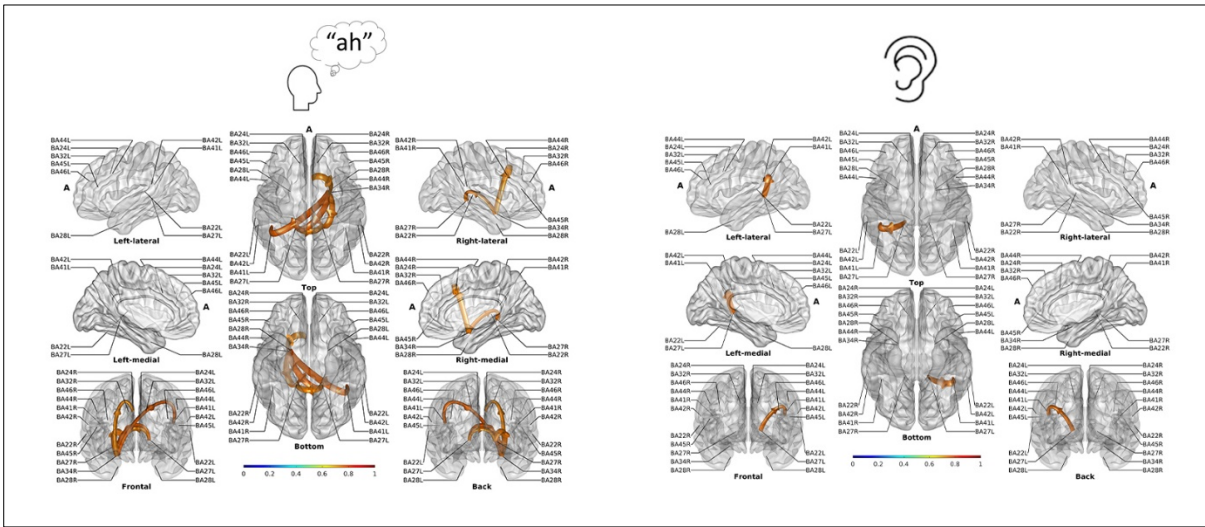

**Supplementary Figure S2. Functional connectivity in healthy subjects during a stimulus time window (0 to 200 ms) in the Talk and Listen paradigms**

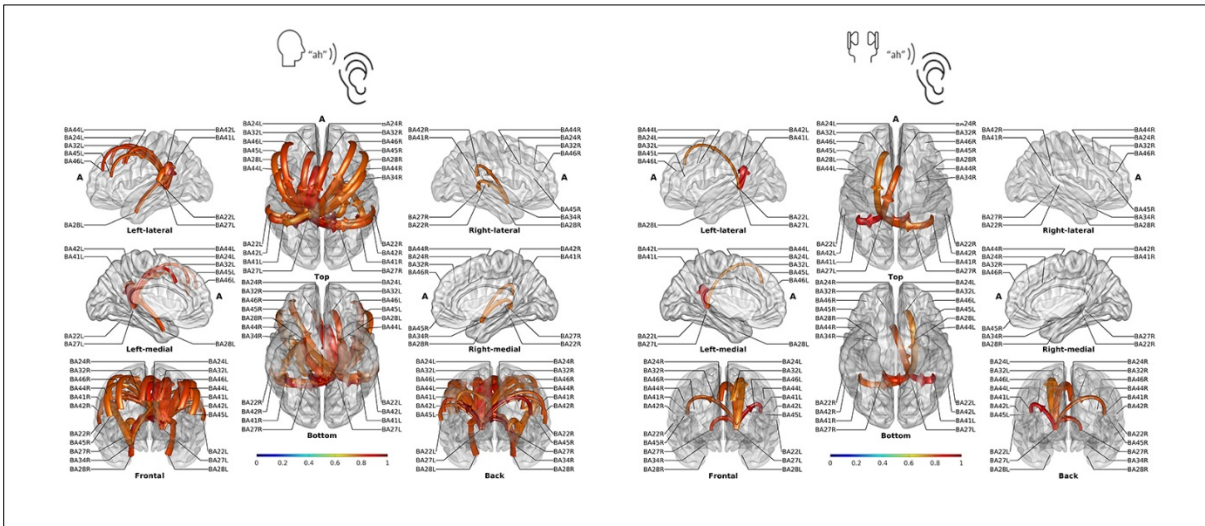

**Supplementary Figure S3. Functional connectivity in schizophrenia during a stimulus time window (0 to 200 ms) in the Talk and Listen paradigm**

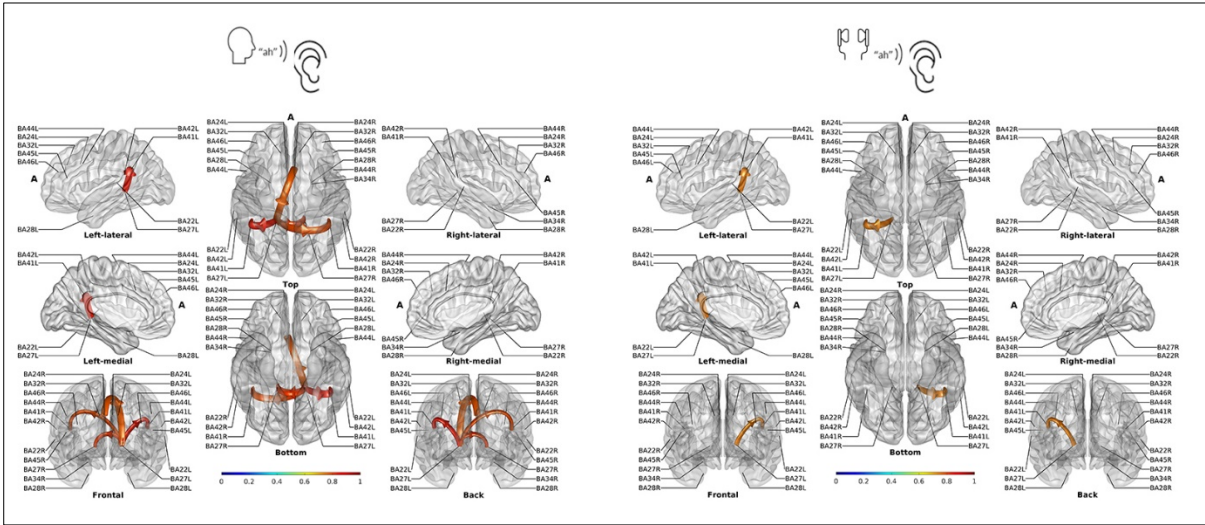

**Supplementary Figure S4. Granger causal connectivity of grand-averaged evoked alpha activity during an auditory prestimulus time window before the exclusion of BA34L (a) and after the exclusion of BA 34L (b)**

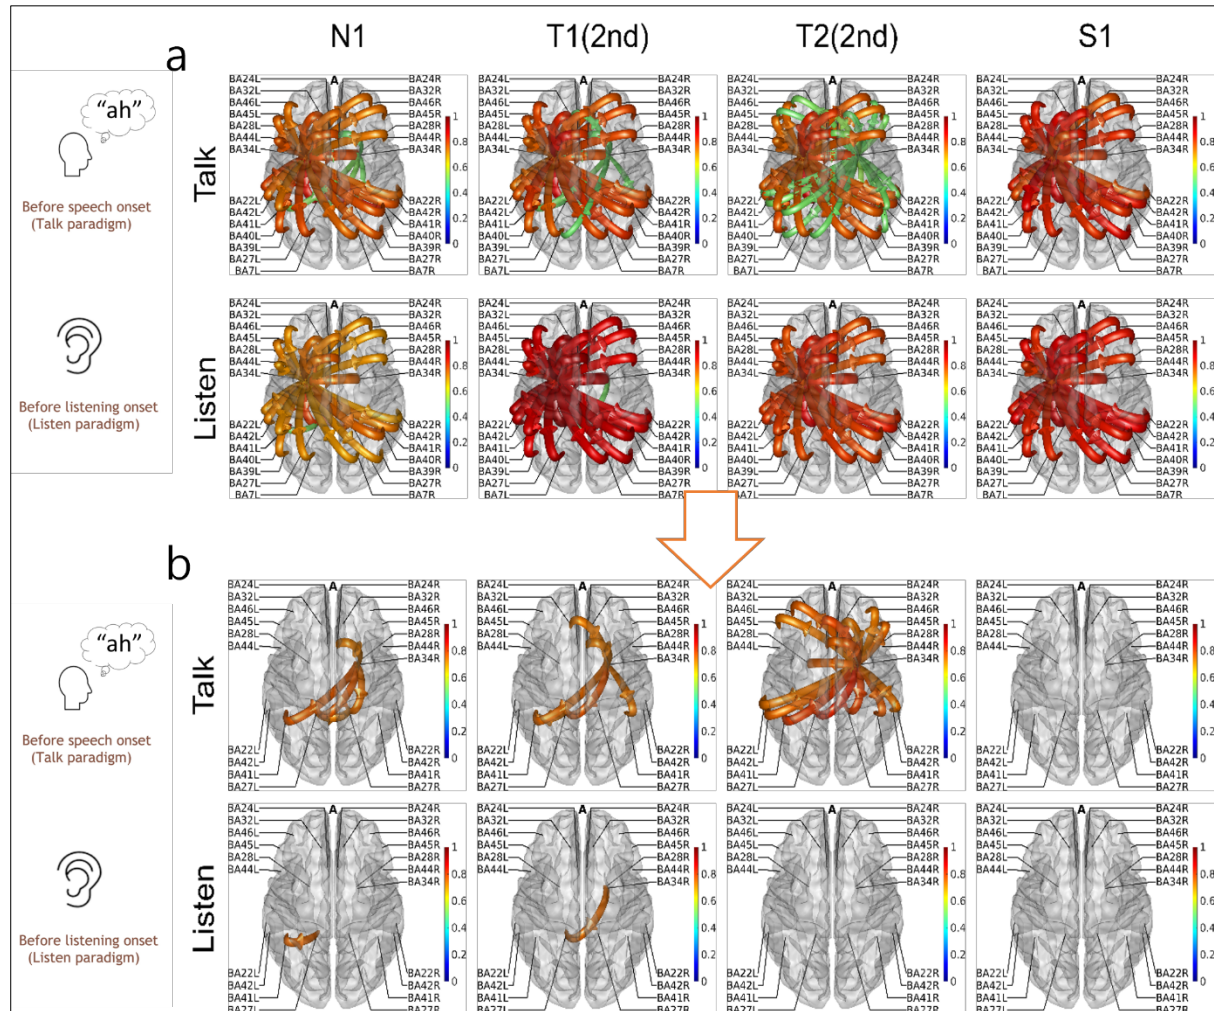

Supplement: s1 [file s1]
